# Supplementary material
Source: Springer Nature journal article supplement (https://www.springermedizin.de/resource/supplementary/13046_2009_154_MOESM3_ESM.pdf/9661748)

**A**

Control  
 Crosslinked  $\alpha 6\beta 4$   
 Control + EGF  
 Crosslinked  $\alpha 6\beta 4$  + EGF

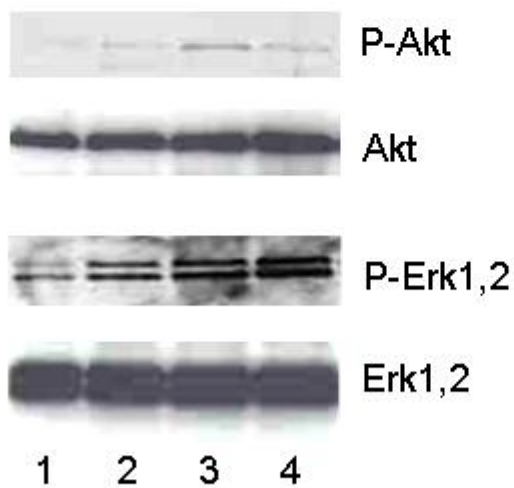**B**

Control (15 min)  
 Crosslinked  $\alpha 6\beta 4$  (15 min)  
 Control + HB-EGF (15 min)  
 Crosslinked  $\alpha 6\beta 4$  + HB-EGF (15 min)  
 Control (30 min)  
 Crosslinked  $\alpha 6\beta 4$  (30 min)  
 Control + HB-EGF (30 min)  
 Crosslinked  $\alpha 6\beta 4$  + HB-EGF (30 min)  
 Control (1 hr)  
 Crosslinked  $\alpha 6\beta 4$  (1 hr)  
 Control + HB-EGF (1 hr)  
 Crosslinked  $\alpha 6\beta 4$  + HB-EGF (1 hr)

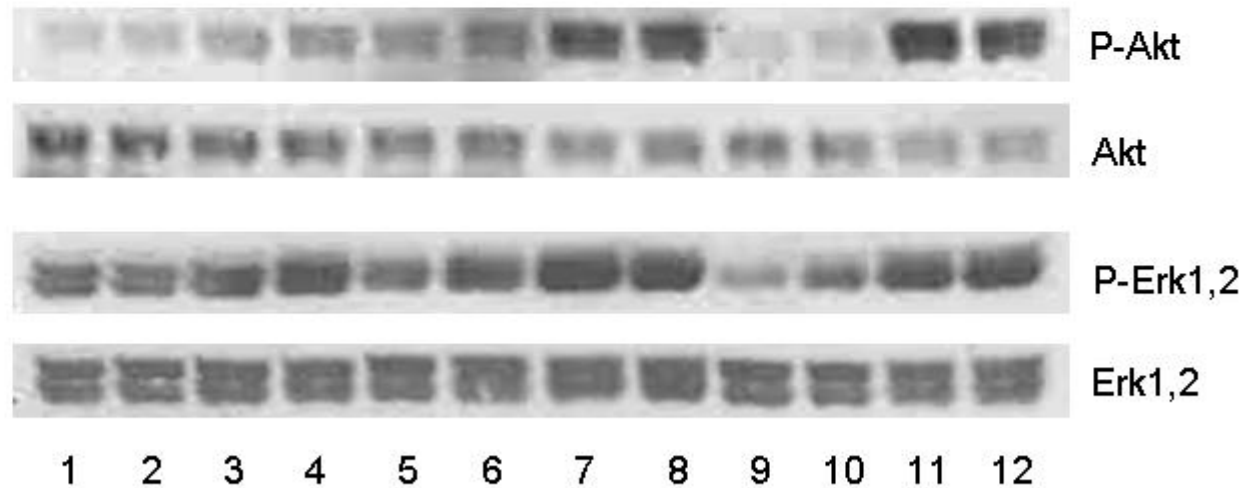

Supplement: MOESM3 [file 9661748]
